# Supplementary material for: Leaky Gut as a Potential Culprit for the Paradoxical Dysglycemic Response to Gastric Bypass-Associated Ileal Microbiota
Source: MDPI journal article supplement (doi:10.3390/metabo11030153), 2021-03-08
Supplement: s1 [file s1]

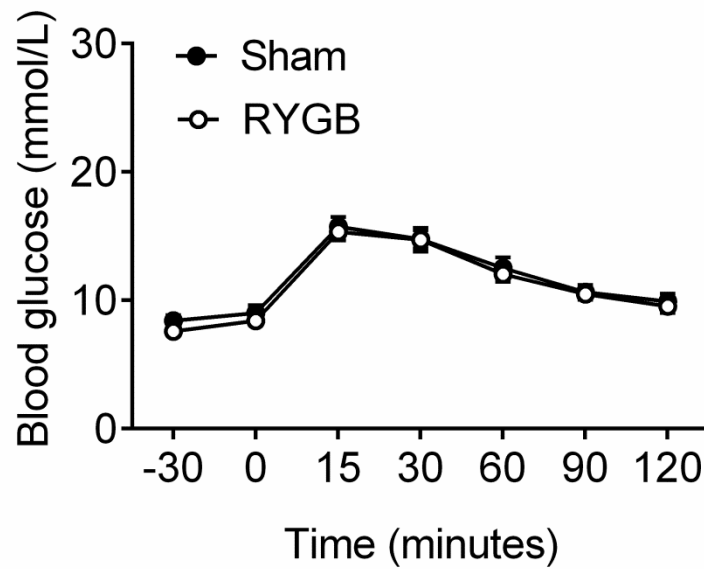

**Figure S1.** Effect of Ileal Content Transfer from RYGB-Treated Rats on Oral Glucose Tolerance in Recipient Germ-Free Mice Tail vein blood glucose concentrations during an oral glucose tolerance test in germ-free mice that had received ileal content from RYGB-treated and sham-operated rats.  $n = 4-5$  mice/group. Data are presented as mean  $\pm$  SEM.
